# Supplementary material
Source: PubMed Central journal article supplement (PMC5286879)
Supplement: JVI.01715-16_zjv999182356s1.pdf [file JVI.01715-16_zjv999182356s1.pdf]

A.

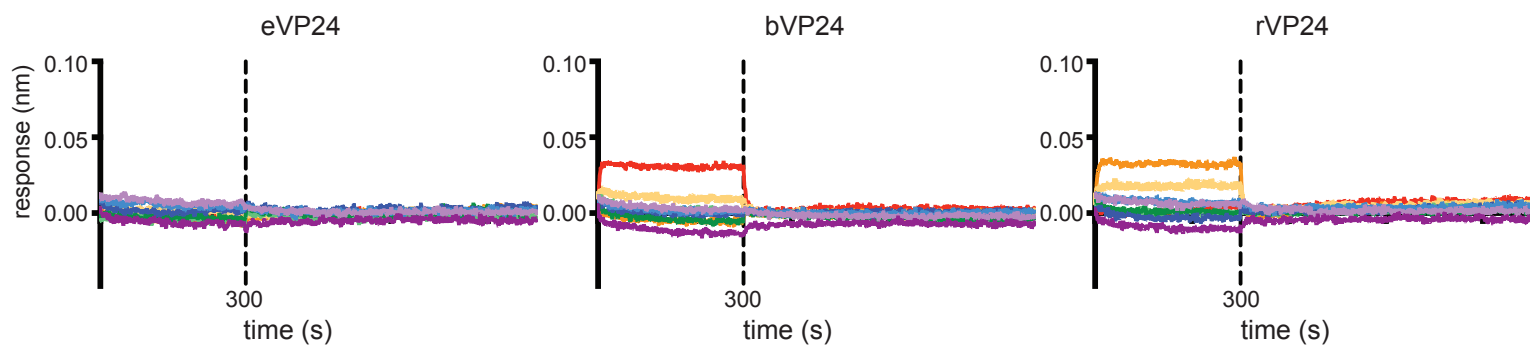

B.

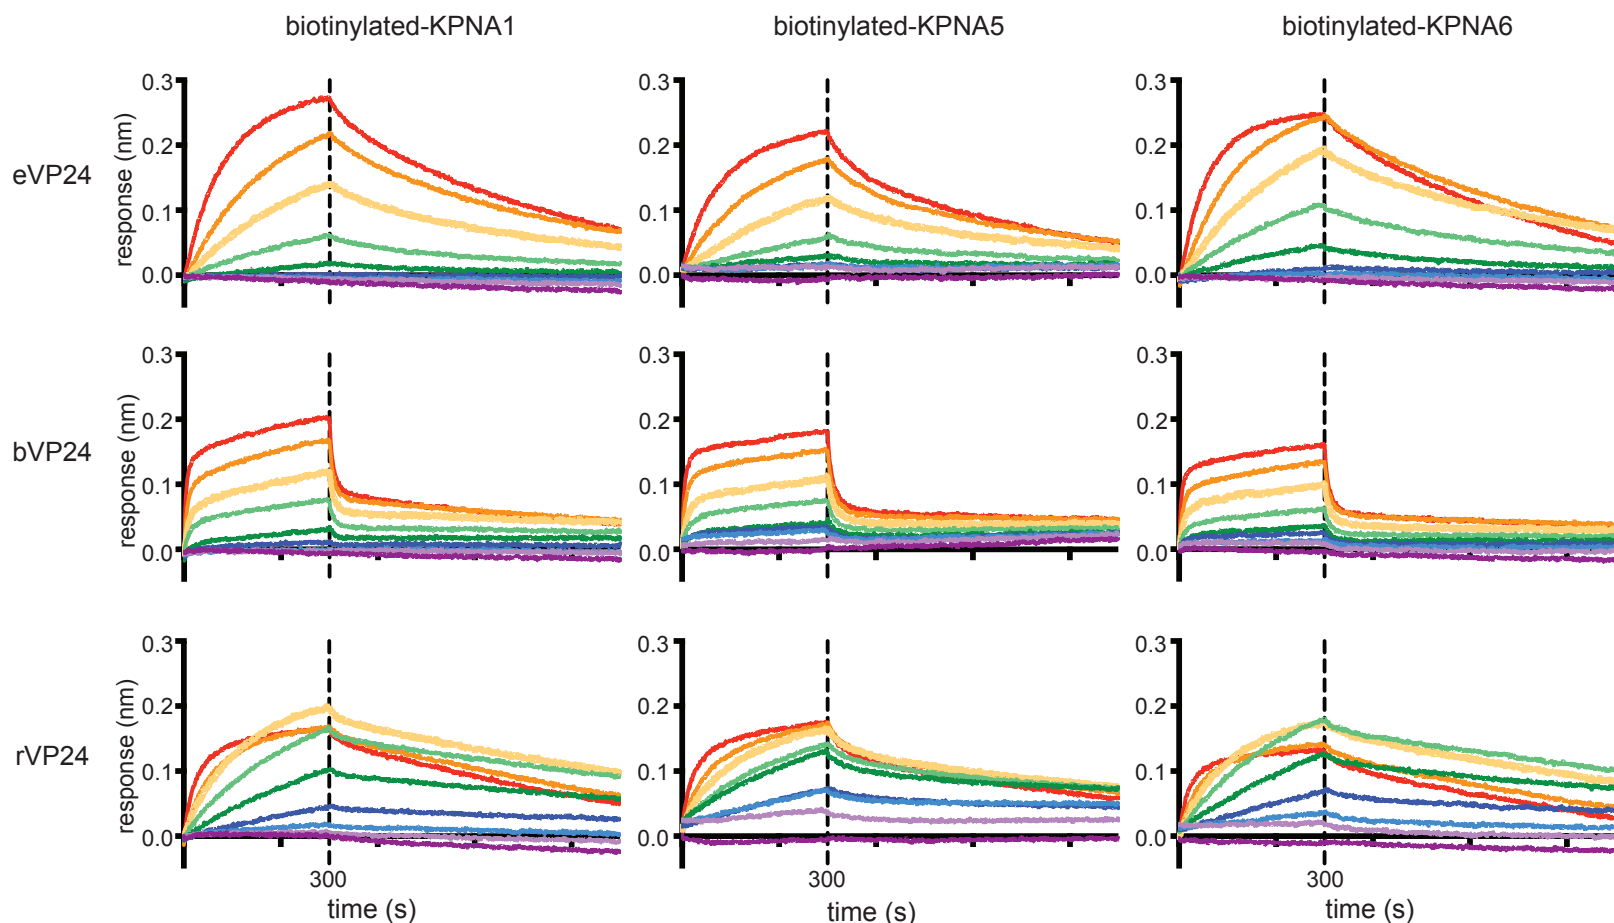

**Supplementary Figure 1. Biolayer interferometry sensorgrams for VP24 proteins binding to KPNA1, KPNA5 and KPNA6.** Processed data are shown as colored lines corresponding to concentration of VP24 from highest to lowest (red, orange, yellow, light green, dark green, dark blue, light blue, light purple and dark purple). A. eVP24, bVP24 and rVP24 do not bind streptavidin sensors in the absence of biotinylated KPNA. B. Kinetics of the association dissociation of eVP24, bVP24 and rVP24 in the presence of biotinylated KPNA1, KPNA5 and KPNA6. The dotted line at 300 seconds (s) indicates the boundary between association and dissociation. A representative sensorgram is shown for each indicated KPNA-VP24 combination.

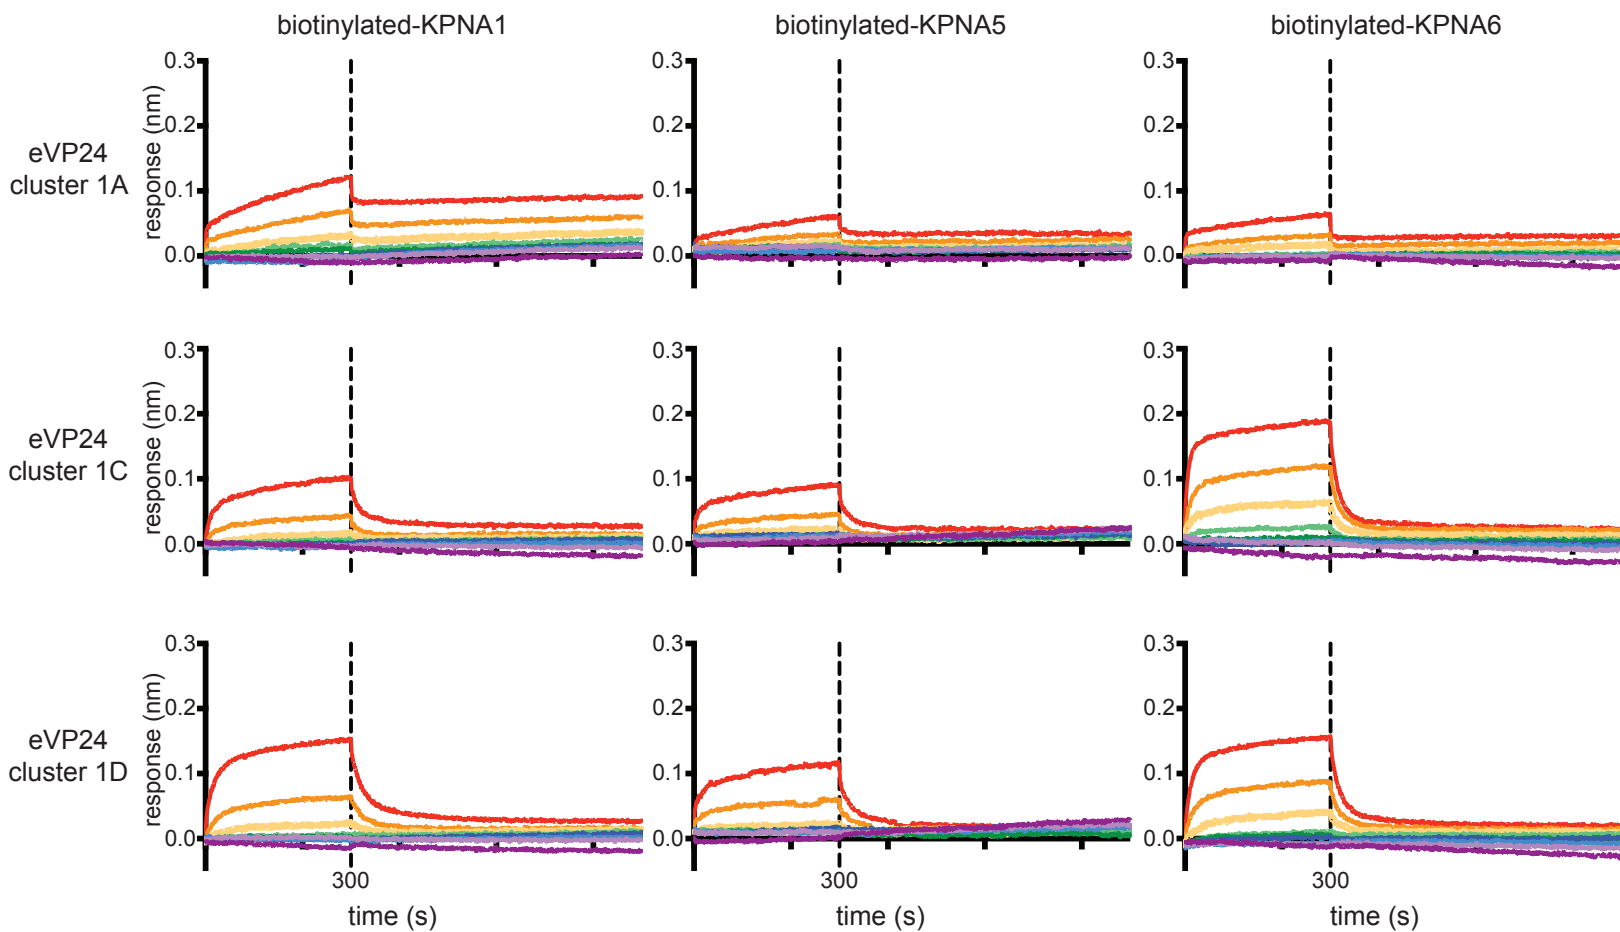

**Supplementary Figure 2. Biolayer interferometry sensorgrams for VP24 mutant proteins binding to KPNA1, KPNA5 and KPNA6.** Processed data are shown as colored lines corresponding to concentration of VP24 from highest to lowest (red, orange, yellow, light green, dark green, dark blue, light blue, light purple and dark purple). The dotted line at 300 seconds (s) indicates the boundary between association and dissociation. A representative sensorgram is shown for each indicated KPNA-VP24 combination.

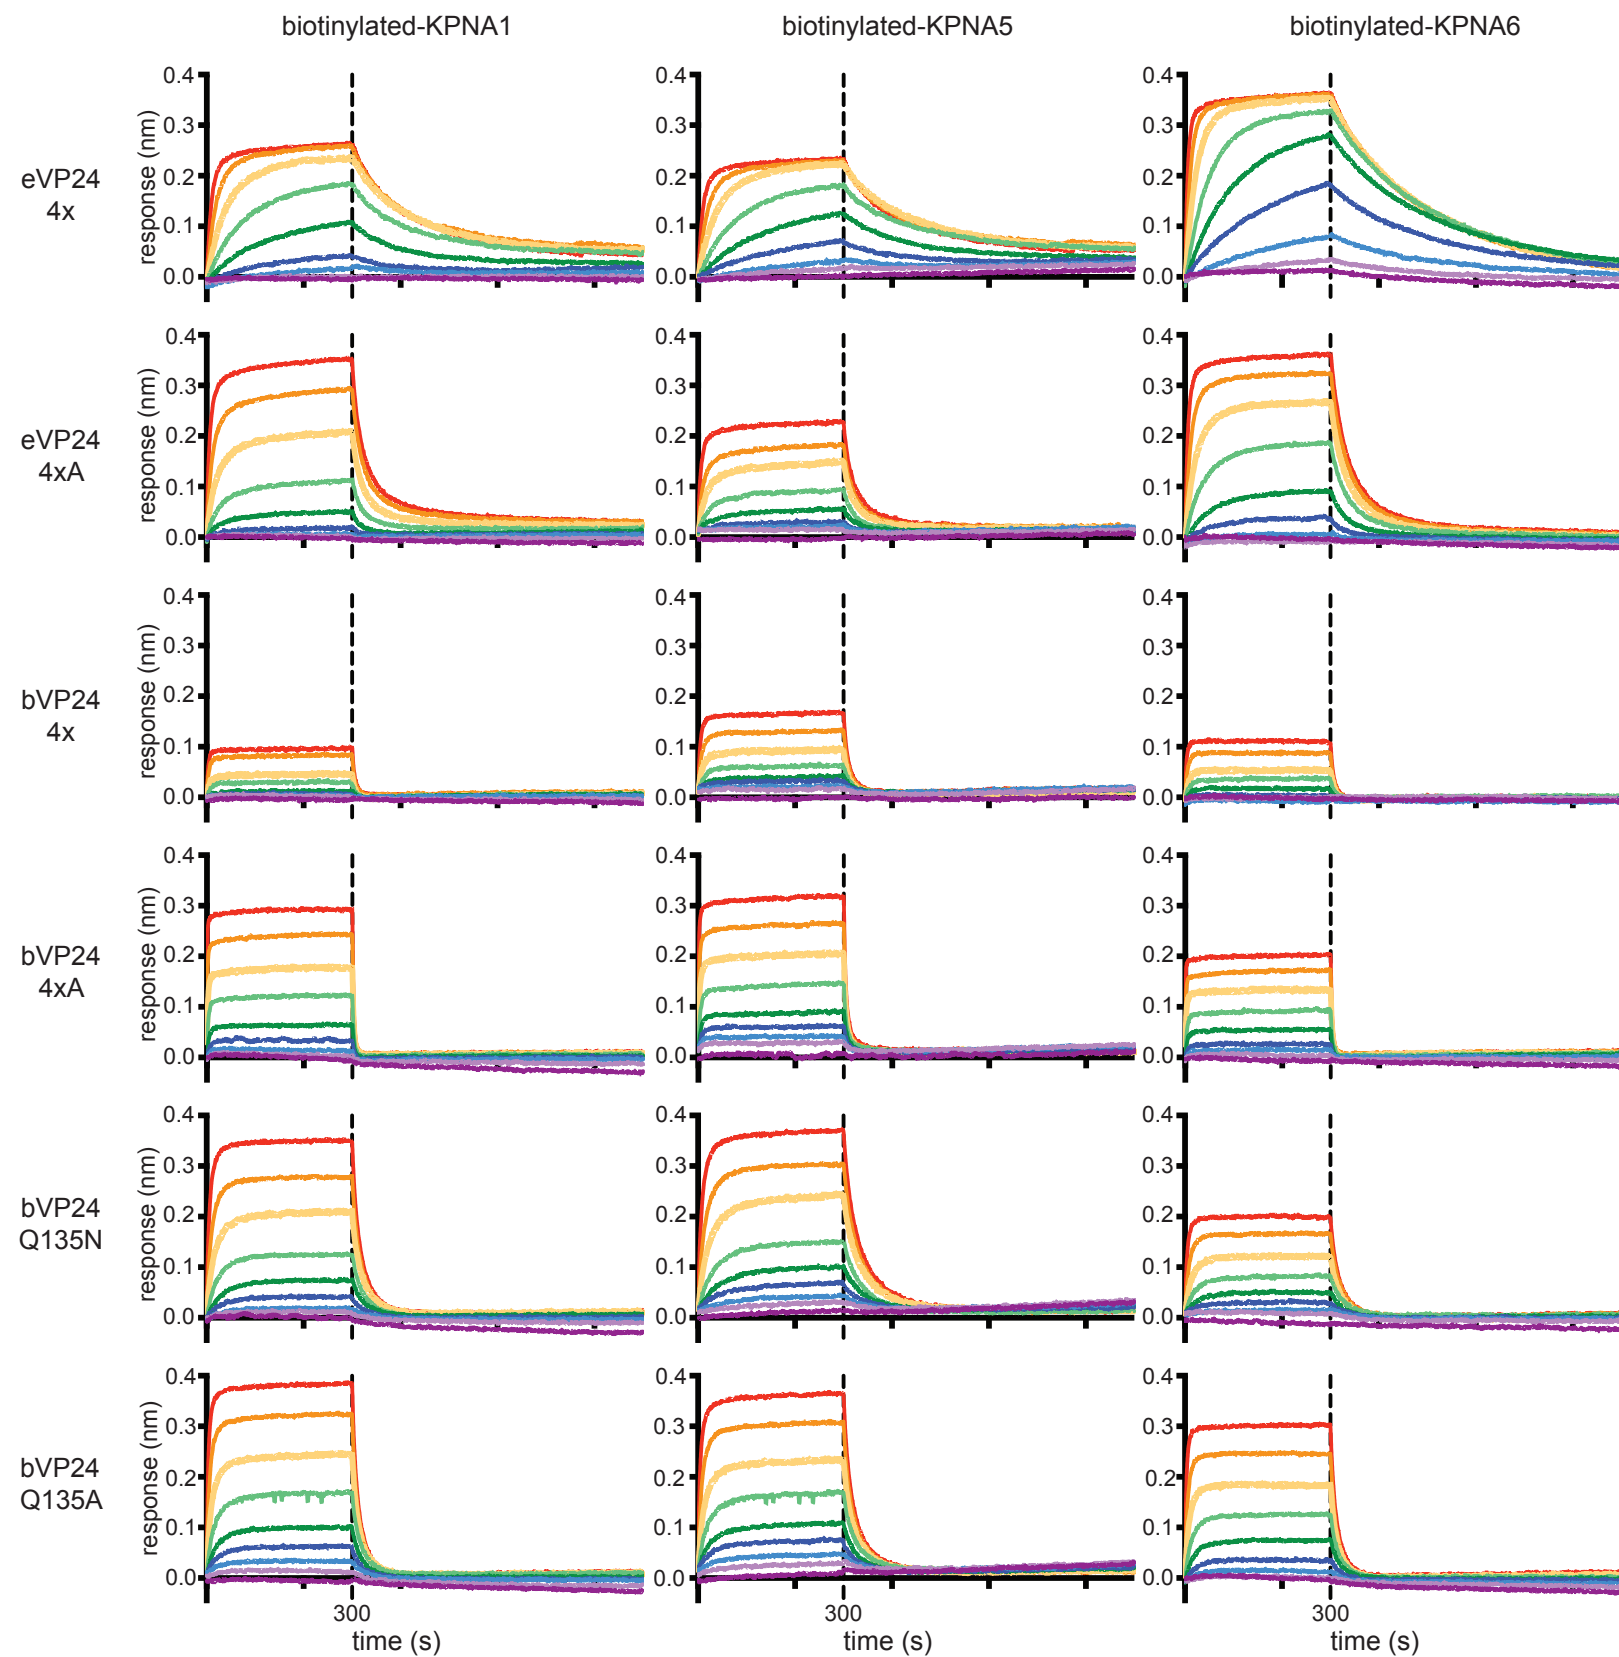

**Supplementary Figure 3. Biolayer interferometry sensorgrams for VP24 mutant proteins binding to KPNA1, KPNA5 and KPNA6.** Processed data are shown as colored lines corresponding to concentration of VP24 from highest to lowest (red, orange, yellow, light green, dark green, dark blue, light blue, light purple and dark purple). The dotted line at 300 seconds (s) indicates the boundary between association and dissociation. A representative sensorgram is shown for each indicated KPNA-VP24 combination.
